# Supplementary material for: Coal-based graphene derived from different coal ranks: exceptional sodium storage performance in sodium-ion batteries
Source: Royal Society of Chemistry journal article supplement (doi:10.1039/d4ra05104a), 2024-01-01
Supplement: d4ra05104a1.pdf [file d4ra05104a1.pdf]

## Supporting Information for

# Coal-based graphene prepared from coal of different rank as precursors for sodium-ion batteries with exceptional sodium storage performances

Lanhao Wang<sup>1,2,3</sup>, Xiaodong Yu<sup>1,2,3</sup>, Zhendong Jiang<sup>1,4,5\*</sup>, Xusheng Li<sup>2,4</sup>, Chuanxiang Zhang<sup>4,5</sup>,

<sup>1</sup> *Key Laboratory of Coal Processing and Efficient Utilization, (China University of Mining and Technology), Ministry of Education, Xuzhou 221116, China;*

<sup>2</sup> *School of Chemical Engineering and Technology, China University of Mining and Technology, Xuzhou 221116, China;*

<sup>3</sup> *State key Laboratory of Coking Coal Resources Green Exploitation, China University of Mining and Technology, Xuzhou 221116, China;*

<sup>4</sup> *Henan Key Laboratory of Coal Green Conversion (Henan Polytechnic University), Jiaozuo 454000, China;*

<sup>5</sup> *Henan Polytechnic University - Ordos Institute of Clean Coal Development and Utilization, Ordos, 017000, China;*

\*Corresponding author: 18623855902@163.com (Z. Jiang)

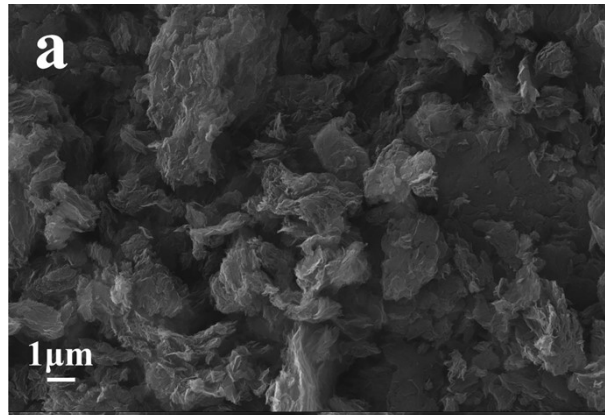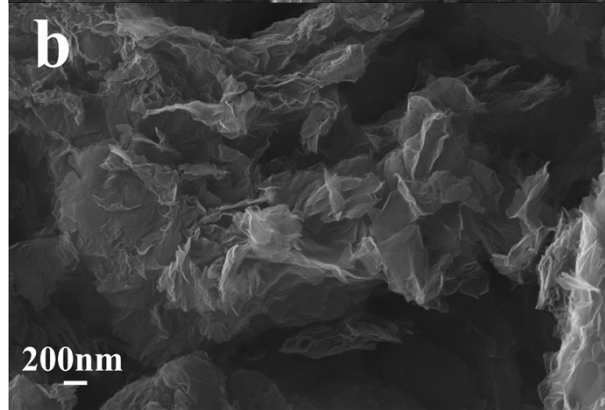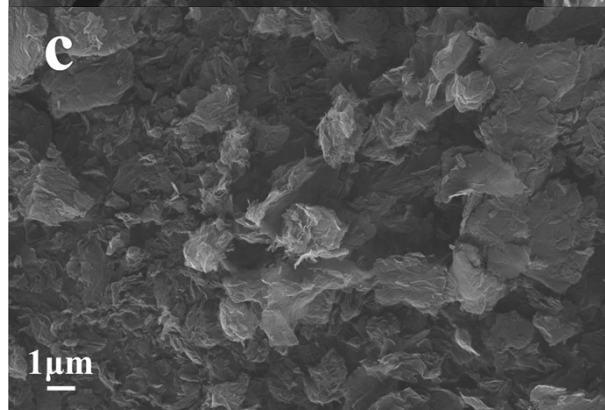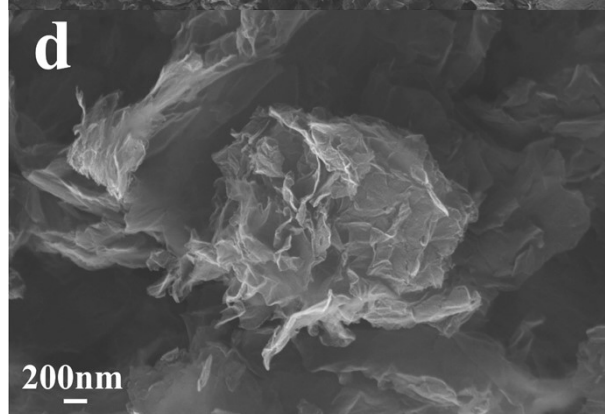

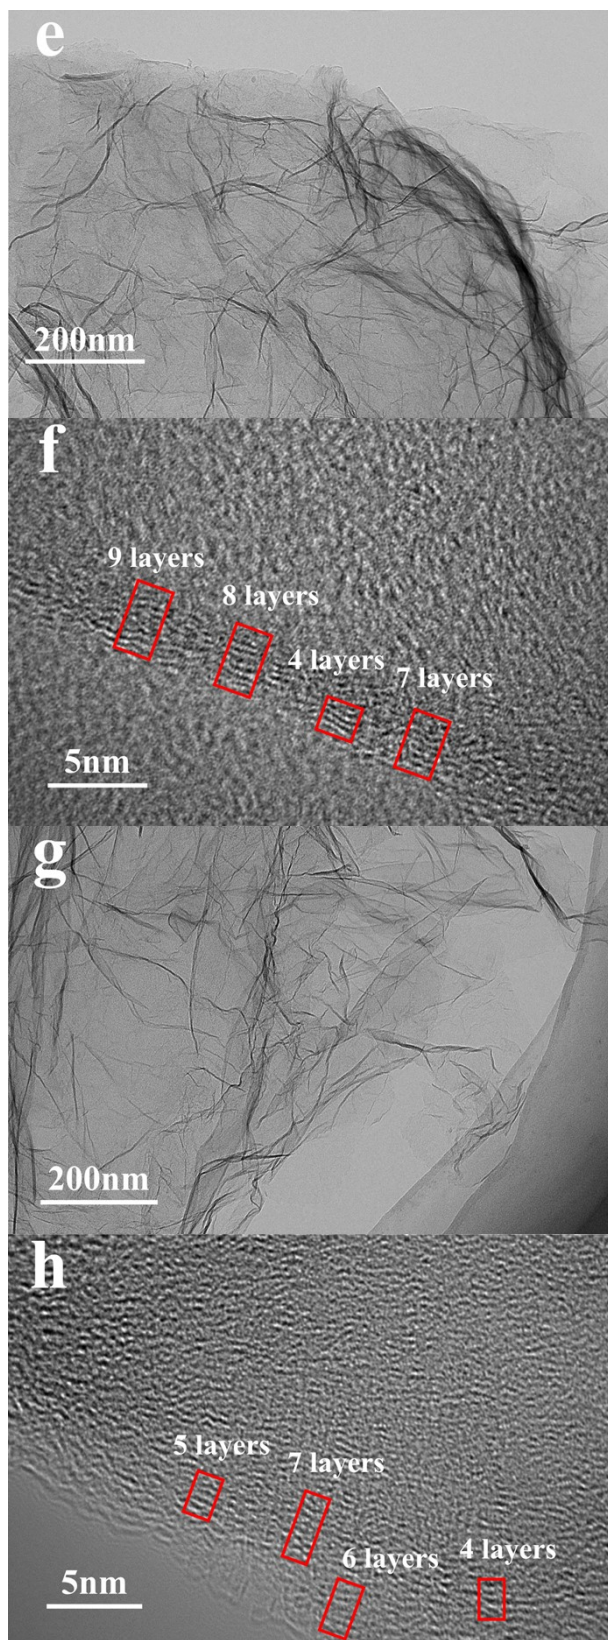

**Fig. S1.** The SEM images and TEM images of ILrGO (a, b, e, f), HBrGO (c, d, g, h).

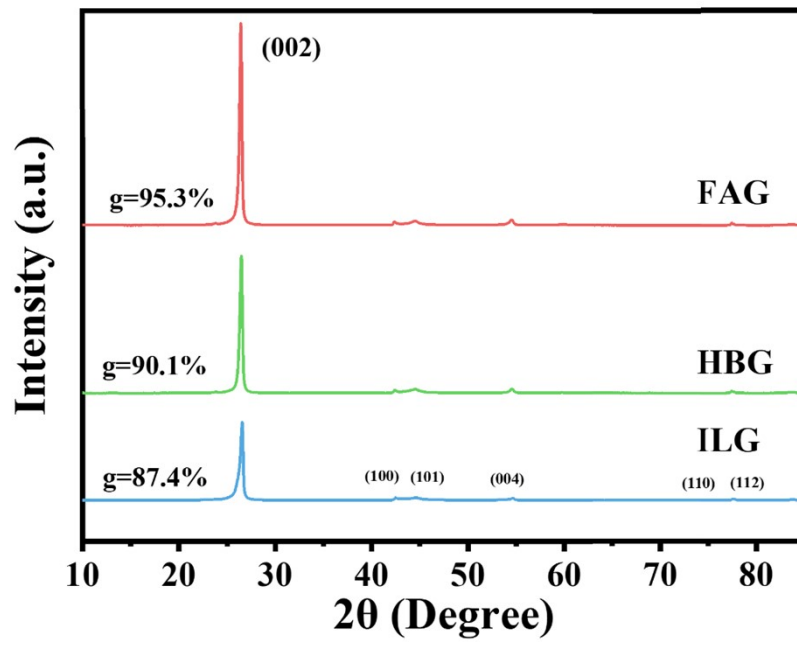

Fig. S2. XRD images of ILG, HBG and FAG.

**Table S1** Pore structure parameters of ILRGO, HBRGO and FARGO (where APD is average pore diameter)

| Samples | $S_{\text{BET}}$ ( $\text{m}^2 \text{g}^{-1}$ ) | $V_{\text{t}}$ ( $\text{cm}^3 \text{g}^{-1}$ ) | $V_{\text{mic}}$ ( $\text{cm}^3 \text{g}^{-1}$ ) | APD (nm) |
|---------|-------------------------------------------------|------------------------------------------------|--------------------------------------------------|----------|
| ILrGO   | 399                                             | 0.91                                           | 0.03                                             | 9.12     |
| HBrGO   | 412                                             | 1.02                                           | 0.04                                             | 9.90     |
| FArGO   | 474                                             | 1.21                                           | 0.05                                             | 10.21    |

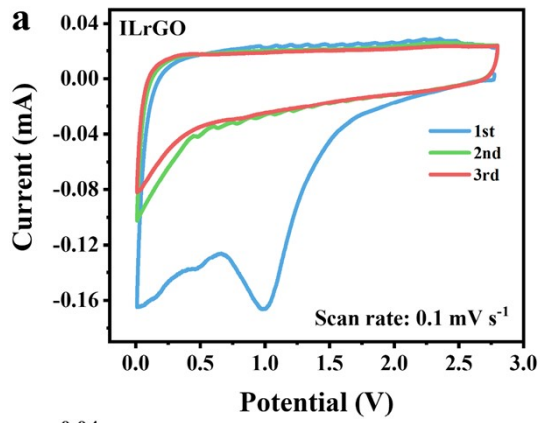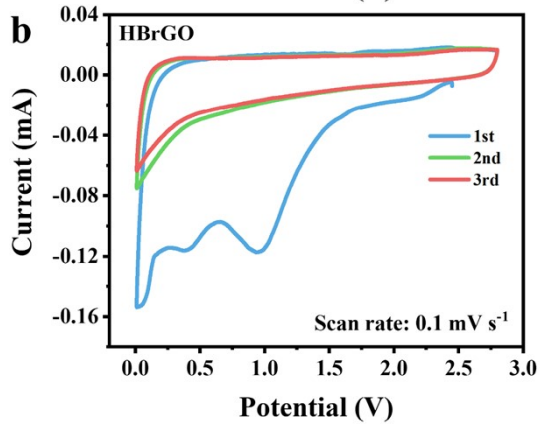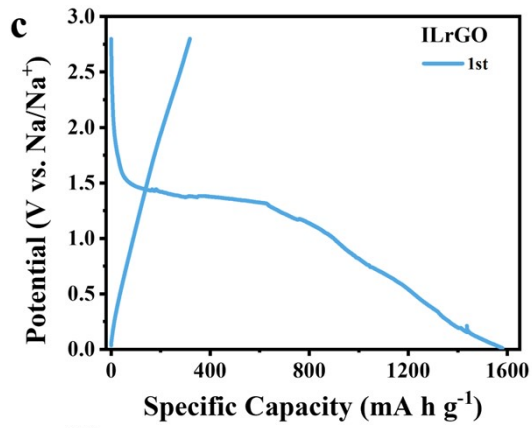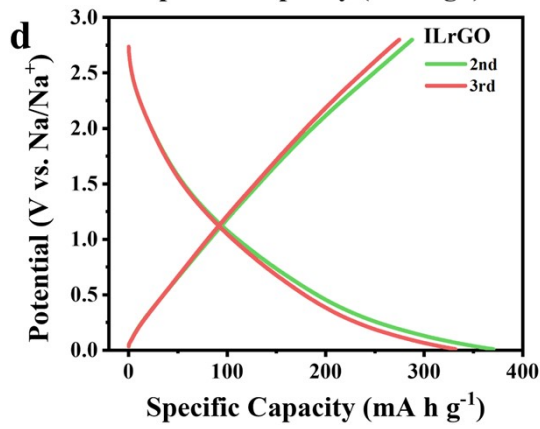

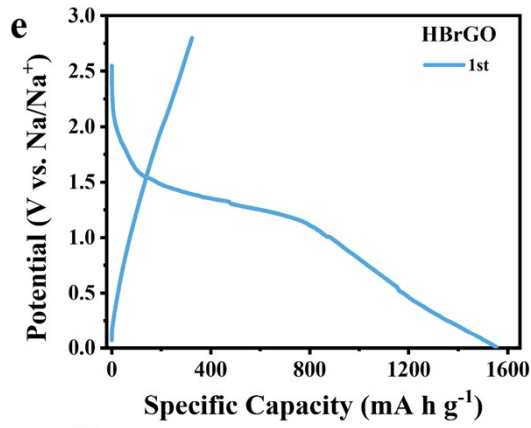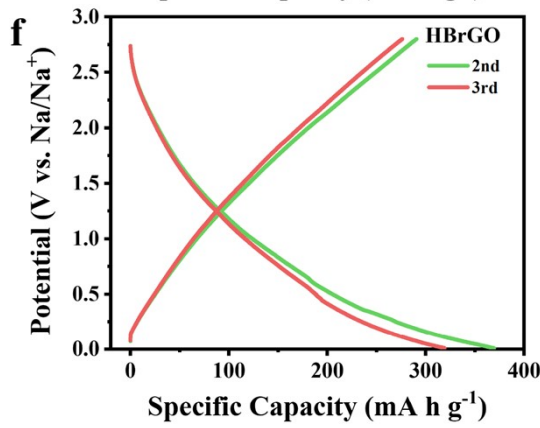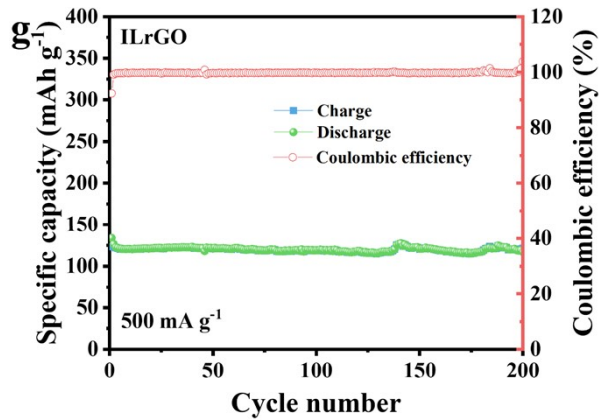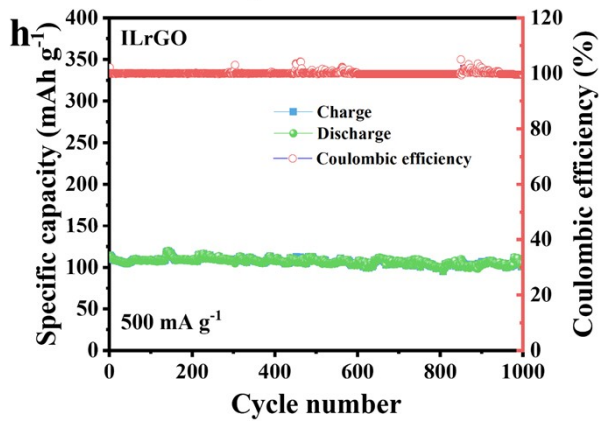

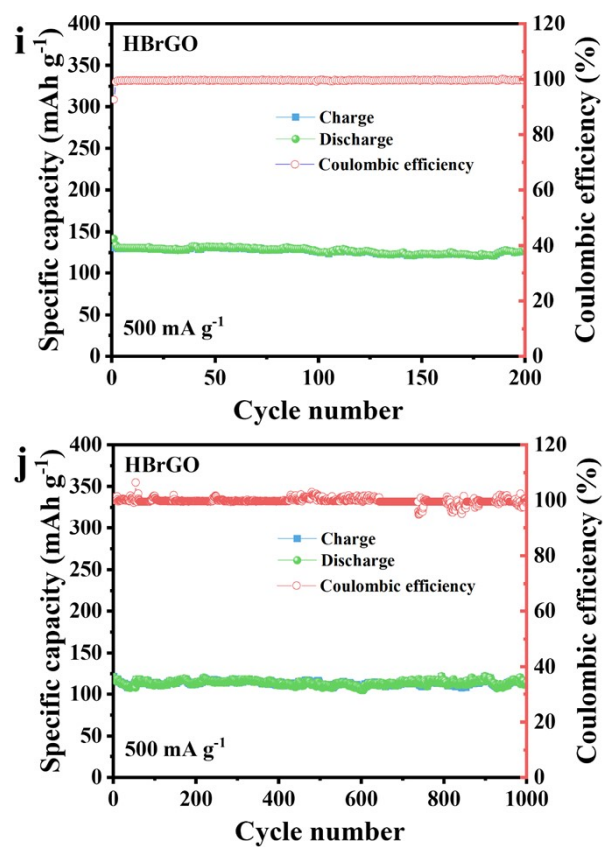

**Fig. S3.** The first three CV curves of ILrGO (a) and HBrGO (b), the first three charge-discharge curves of ILrGO (c, d) and HBrGO (e, f), and the cycle performance under  $0.5 \text{ A g}^{-1}$  and  $1 \text{ A g}^{-1}$  of ILrGO (g, h) and HBrGO (i, j).
